# Supplementary material
Source: Springer Nature journal article supplement (https://www.springermedizin.de/resource/supplementary/12957_2008_508_MOESM3_ESM.pdf/9564872)
Supplement: MOESM3 [file 9564872]

AKIS NIKOLAOS

HP

G.KLIN. AGIOS PAN  
MAGNET  
H-S

955

007

90  
5 21:34  
18.0  
2.0/1  
02:18  
2

SP  
SL  
FOV  
161  
Cor>1

W  
C

NTAKIS NIKOLAOS
